# Supplementary material
Source: HighWire-hosted journal article supplement (https://bmjopen.bmj.com/content/12/9/e066624)
Supplement: inline-supplementary-material-2 [file inline-supplementary-material-2.pdf]

## Supplementary Methods. Template of registry data form for peer reviewers

You recently agreed to review the following study: [Manuscript Title] for [Journal Name] (manuscript # XXXXXXXX).

You may find the following information helpful as you perform your review. The trial was registered with [Registry Name] (Registration Number) on [Registration Date], [before/after] the start of enrollment.

At the time enrollment began the primary outcome measure was: [Registered Primary Outcome Measure(s)]

As a reminder, the World Health Organization (WHO) defines a clinical trial as any research study that prospectively assigns human participants or groups of humans to one or more health-related interventions to evaluate the effects on health outcomes; you are receiving this information because the study under review meets this definition.

The WHO and International Committee of Medical Journal Editors mandate that all clinical trials be registered prior to the start of enrollment, and that all primary and secondary outcome measures be clearly defined before participant enrollment begins

**Supplementary Table 1. Characteristics of participating journals**

| Journal                                          | Specialty                          | 2019 Impact Factor <sup>a</sup> | Impact Factor Rank within Journal Category | Editorial Office Location | Clinical Trials Published in 2018 <sup>b</sup> |
|--------------------------------------------------|------------------------------------|---------------------------------|--------------------------------------------|---------------------------|------------------------------------------------|
| Academic Emergency Medicine                      | Emergency Medicine                 | 3.064                           | 6/31                                       | United States             | 19                                             |
| American Journal of Transplantation              | Transplantation; Surgery           | 7.338                           | 2/24; 6/210                                | United States             | 39                                             |
| Annals of Emergency Medicine                     | Emergency Medicine                 | 5.799                           | 1/31                                       | United States             | 22                                             |
| Archives of Physical Medicine and Rehabilitation | Rehabilitation; Sport Sciences     | 3.098                           | 9/68; 17/85                                | United States             | 65                                             |
| British Journal of Ophthalmology                 | Ophthalmology                      | 3.611                           | 9/60                                       | United Kingdom            | 30                                             |
| Clinical Orthopaedics and Related Research       | Orthopedics; Surgery               | 4.329                           | 5/82; 19/210                               | United States             | 17                                             |
| Gastroenterology                                 | Gastroenterology and Hepatology    | 17.373                          | 4/88                                       | United States             | 44                                             |
| Heart                                            | Cardiac and Cardiovascular Systems | 5.213                           | 26/138                                     | United Kingdom            | 23                                             |
| International Journal of Cancer                  | Oncology                           | 5.145                           | 59/244                                     | Germany                   | 28                                             |
| Journal of the American College of Surgeons      | Surgery                            | 4.590                           | 13/210                                     | United States             | 11                                             |
| Neurology                                        | Clinical Neurology                 | 8.770                           | 10/204                                     | United States             | 59                                             |
| Surgery                                          | Surgery                            | 3.356                           | 41/210                                     | United States             | 16                                             |
| Thorax                                           | Respiratory System                 | 10.844                          | 5/64                                       | United Kingdom            | 31                                             |

<sup>a</sup> 2019 Journal Impact Factor, Journal Citation Reports (Clarivate Analytics, 2021)

<sup>b</sup> Based on PubMed search for: "2018/01/01-2019/01/01" [Publication Date] AND "clinical trial" [Publication Type] AND Journal Title [Journal].

**Supplementary Table 2. Characterization of outcome changes among published trials with inconsistent registered and published outcomes**

| Type of Outcome Inconsistency <sup>a</sup>                                                      | Control Group Trials (n=21) | Intervention Group Trials (n=15) |
|-------------------------------------------------------------------------------------------------|-----------------------------|----------------------------------|
| Registered primary outcome reported as secondary outcome in published manuscript; n (%)         | 13 (62%)                    | 7 (47%)                          |
| Registered primary outcome not reported in published manuscript; n (%)                          | 8 (38%)                     | 7 (47%)                          |
| Published manuscript includes new primary outcome <sup>b</sup> ; n (%)                          | 16 (76%)                    | 9 (60%)                          |
| Published primary outcome described as secondary in registry; n (%)                             | 7 (33%)                     | 6 (40%)                          |
| Timing of assessment of primary outcome variable differs between registry and manuscript; n (%) | 15 (71%)                    | 8 (53%)                          |

<sup>a</sup> More than one type of outcome inconsistency per trial was possible

<sup>b</sup> Does not include unregistered and retrospectively registered trials

**Supplementary Figure 1. Proportion of manuscripts accepted for publication, by intervention phase and study month.**
